# Supplementary material for: Amidothiourea based colorimetric receptors for basic anions: evidence of anion induced deprotonation of amide –NH proton and hydroxide induced anion⋯π interaction with the deprotonated receptors
Source: Royal Society of Chemistry journal article supplement (doi:10.1039/c3ra23123b), 2013-01-01
Supplement: c3ra23123b.pdf [file c3ra23123b.pdf]

Electronic Supplementary Information

**Amidothiourea based colorimetric receptors for basic anions: evidences of anion induced deprotonation of amide –NH proton and hydroxide induced anion... $\pi$  interaction with the deprotonated receptors**

*Arghya Basu, Sandeep Kumar Dey and Gopal Das\**

Department of Chemistry

Indian Institute of Technology, Guwahati

E-mail: gdas@iitg.ernet.in

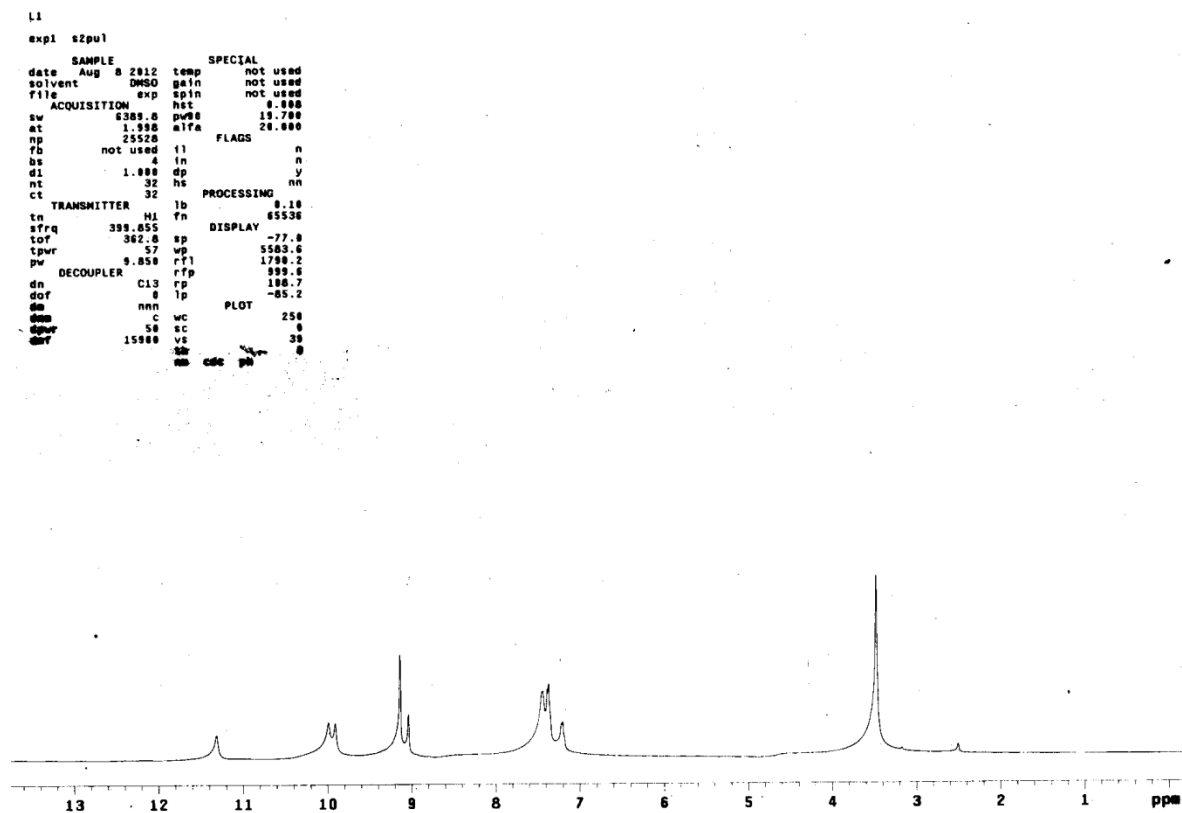

Fig.S1  $^1\text{H}$ -NMR spectrum of receptor L1 in  $d_6$ -DMSO at 298K.

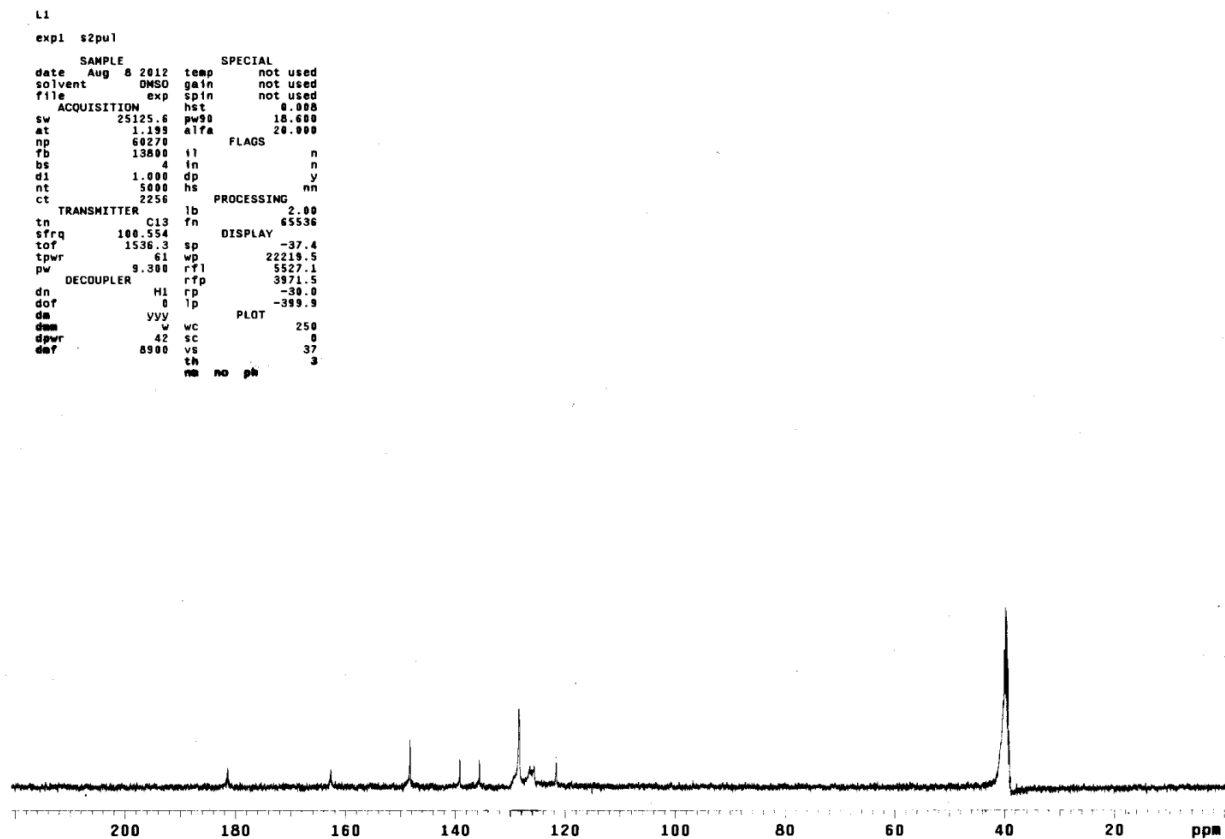

Fig.S2  $^{13}\text{C}$ -NMR spectrum of receptor L1 in  $d_6$ -DMSO at 298K.

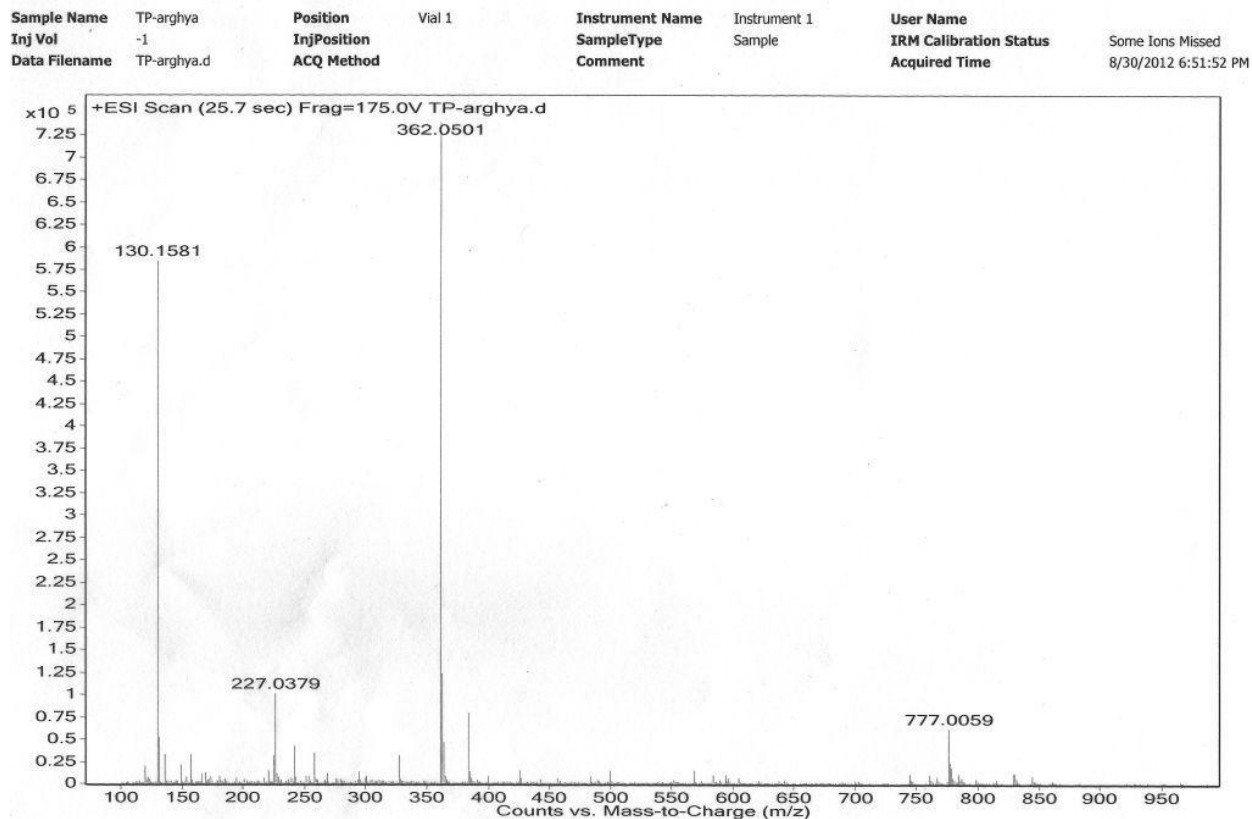

**Fig.S3** Mass spectrum of receptor L1 in acetonitrile.

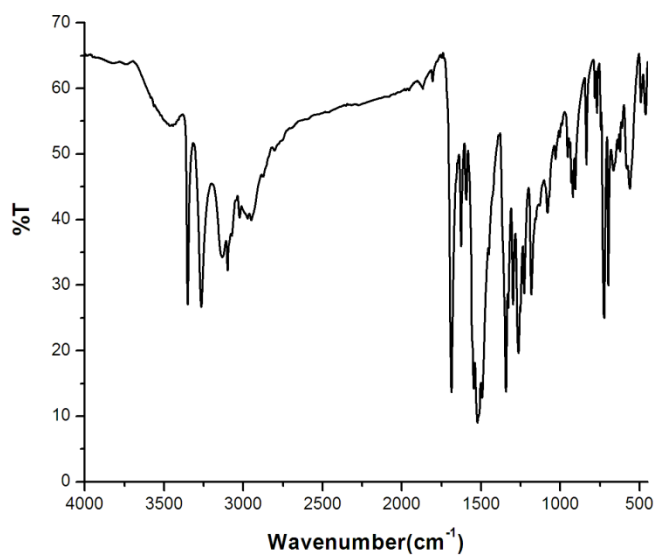

**Fig.S4** IR spectrum of receptor L1.

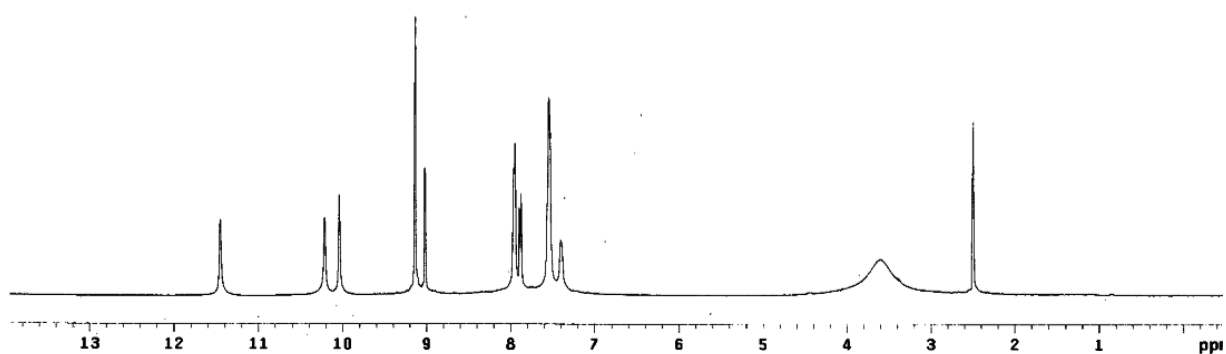

**Fig.S5** <sup>1</sup>H NMR spectrum of receptor L2 in *d*<sub>6</sub>-DMSO at 298K.

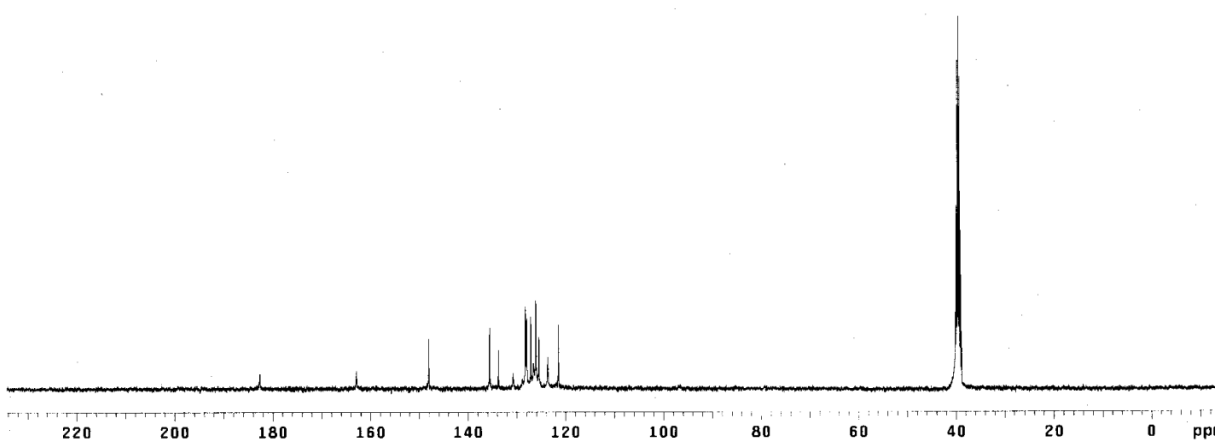

**Fig.S6** <sup>13</sup>C NMR spectrum of receptor L2 in *d*<sub>6</sub>-DMSO at 298K.

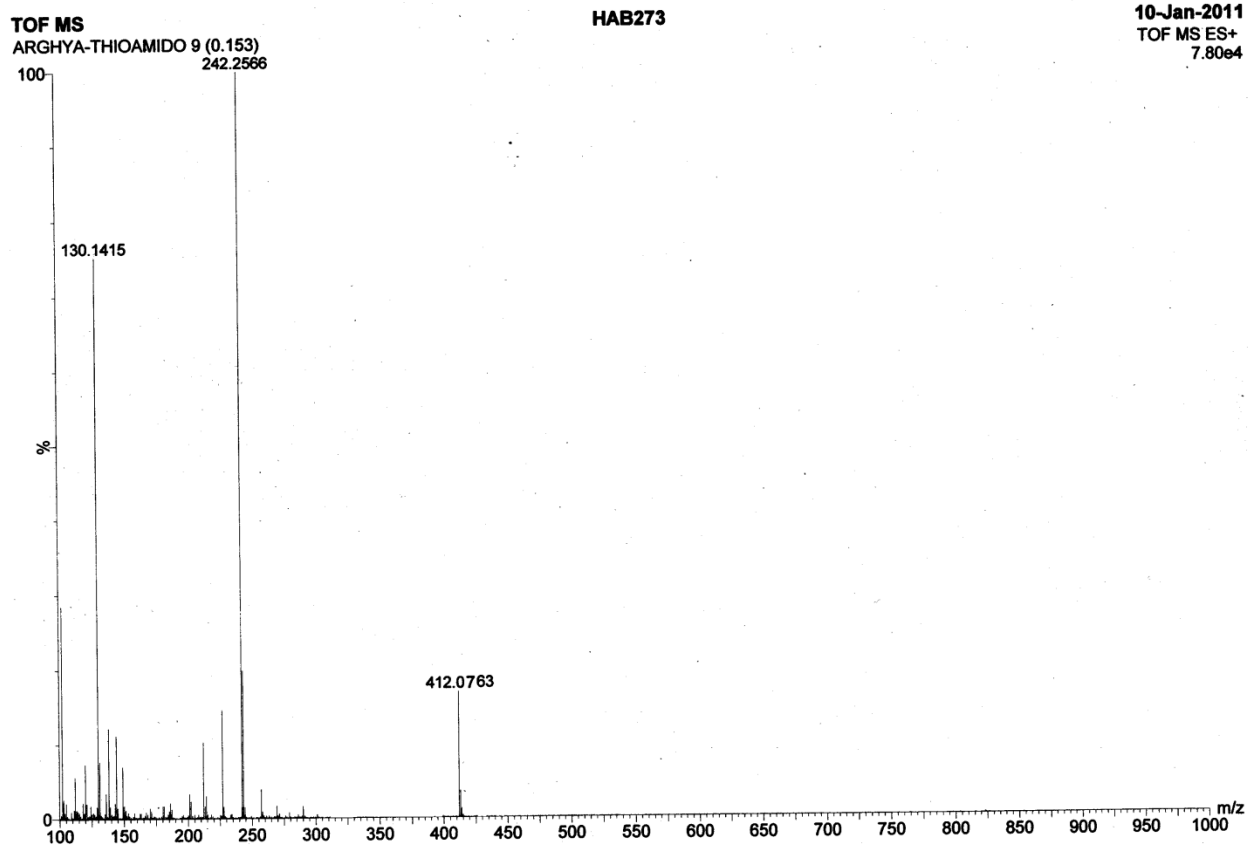

Fig. S7 ESI-Mass spectrum of receptor L2 in acetonitrile.

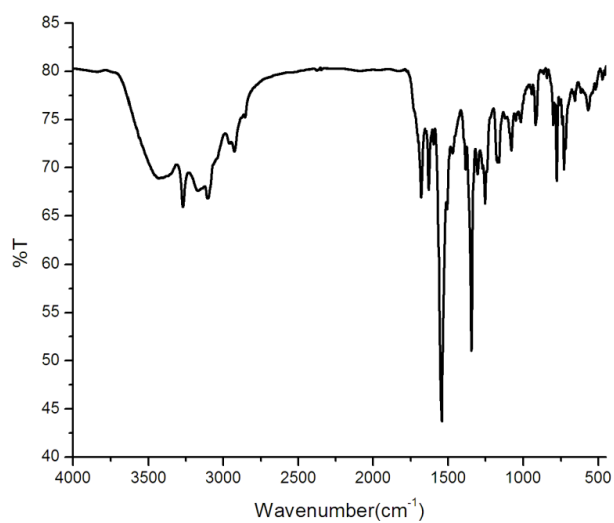

Fig.S8 IR spectrum of receptor L2.

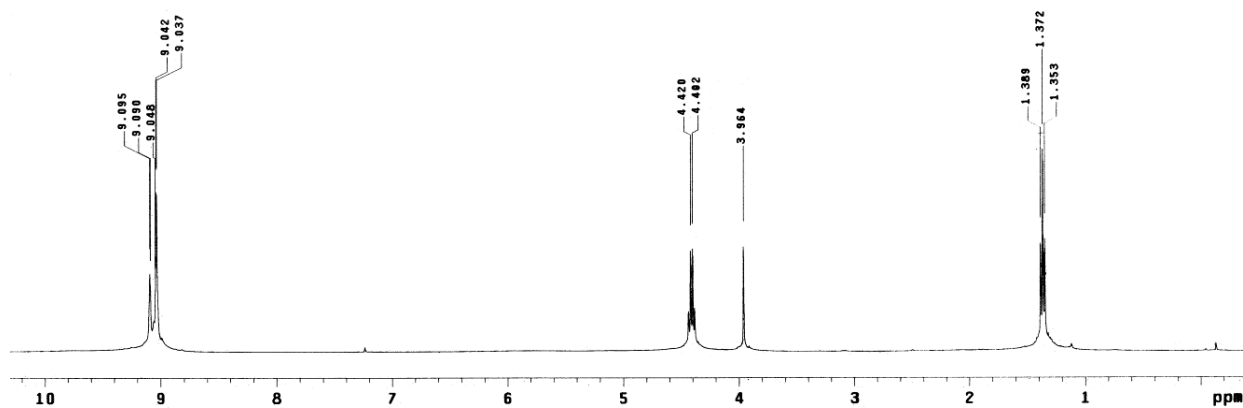

**Figure S9.**  $^1\text{H}$  NMR spectrum of control receptor  $\text{L}_\text{C}$  in  $\text{CDCl}_3$  at 298 K. (Figure reproduced from S. K. Dey and G. Das, *Chem. Commun.*, 2011, **47**, 4983–4985).

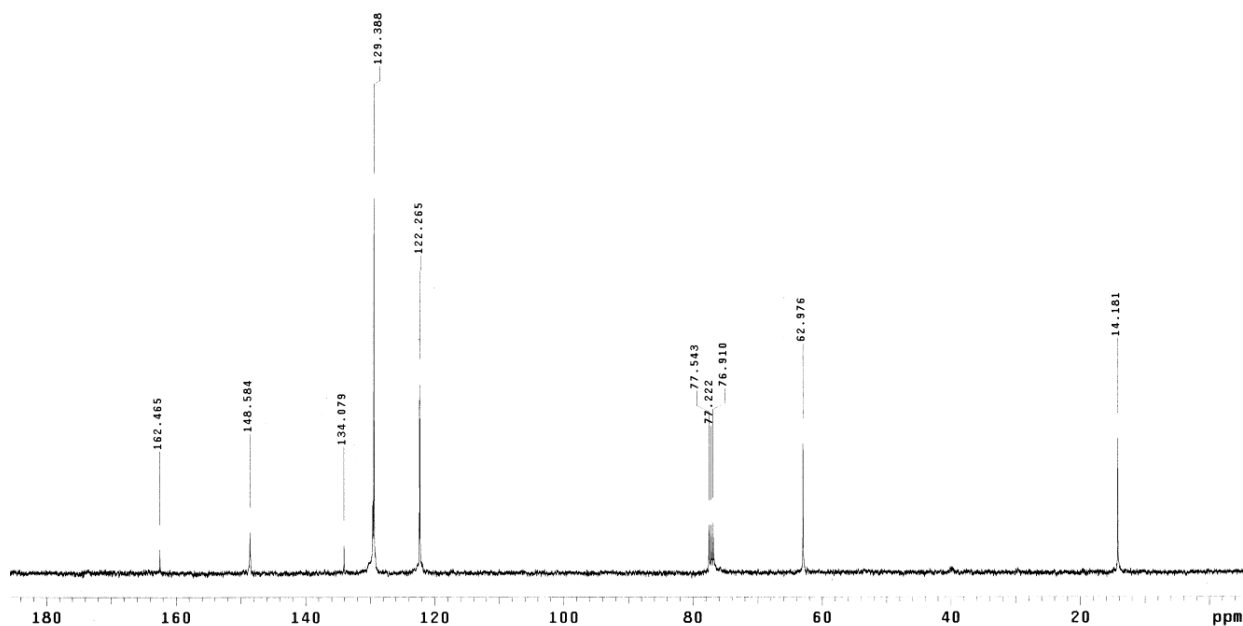

**Fig.S10**  $^{13}\text{C}$  NMR spectrum of control receptor  $\text{L}_\text{C}$  in  $\text{CDCl}_3$  at 298K. (Figure reproduced from S. K. Dey and G. Das, *Chem. Commun.*, 2011, **47**, 4983–4985).

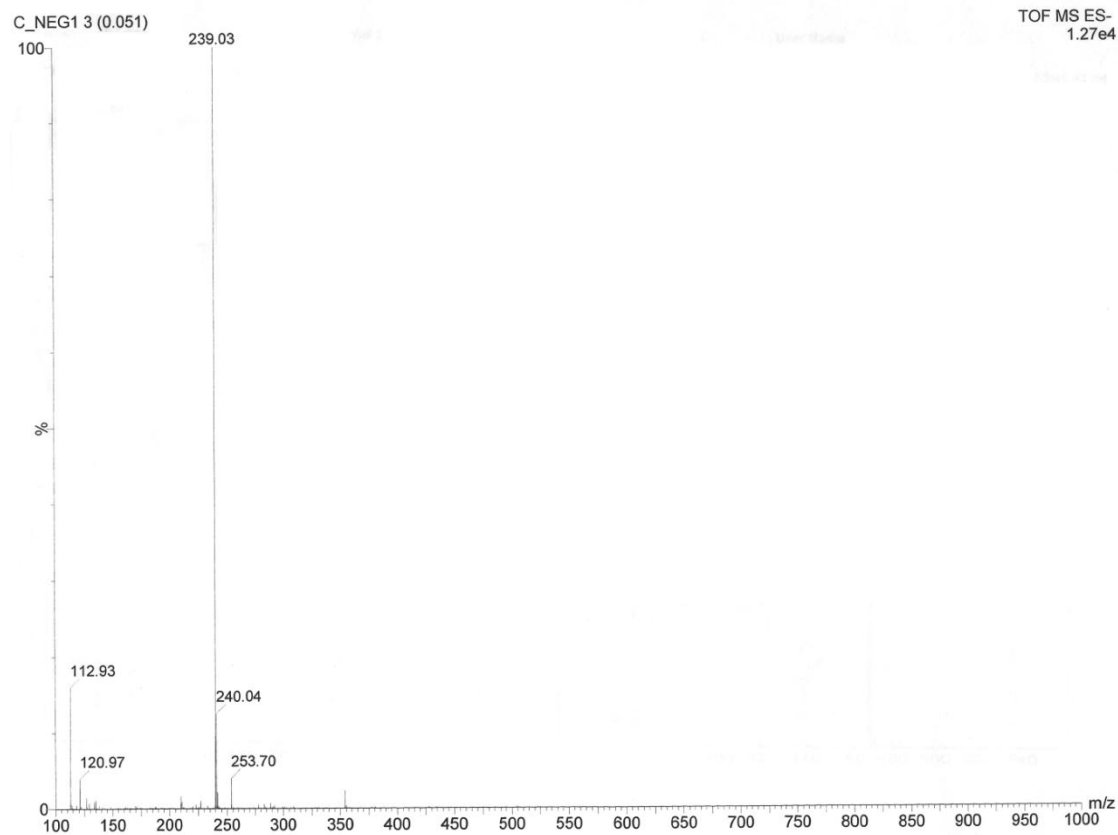

**Fig. S11** ESI-Mass spectrum of receptor  $L_C$  in acetonitrile.

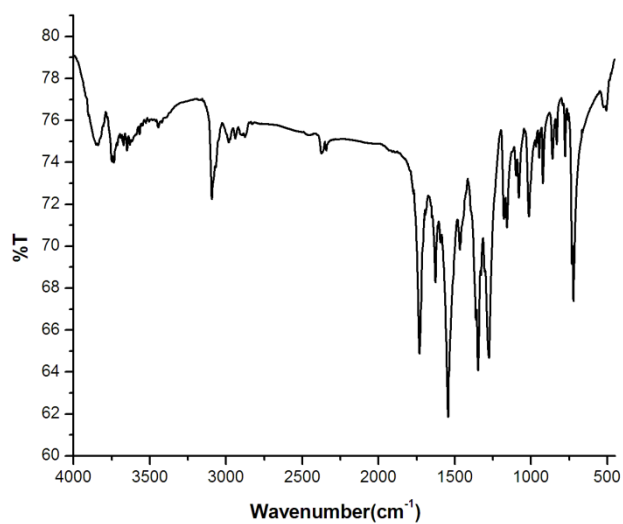

**Fig.S12** IR spectrum of receptor  $L_C$ .



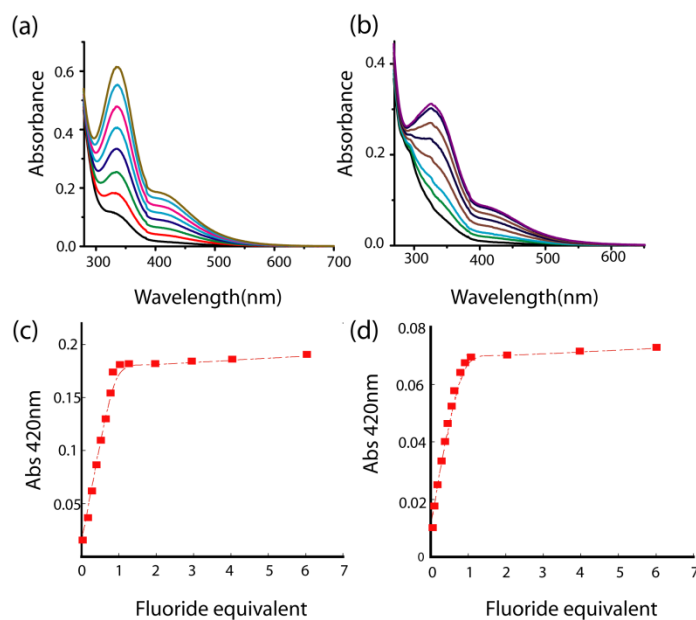

**Fig.S13** a) UV-vis titration of the receptor L1 ( $4.0 \times 10^{-5}$  M) in CH<sub>3</sub>CN solution with standard solution of [n-Bu<sub>4</sub>N]F. (b) The change of UV-vis spectra of the receptor L2 ( $3.4 \times 10^{-5}$  M) in CH<sub>3</sub>CN solution upon gradual addition of standard solution of [n-Bu<sub>4</sub>N]F. (c) Relative change in the absorption spectra of L1 ( $4.0 \times 10^{-5}$  M) at 420 nm upon addition of fluoride anions in CH<sub>3</sub>CN. (d) Plot of the change in the absorption of L2 upon addition of fluoride in CH<sub>3</sub>CN.

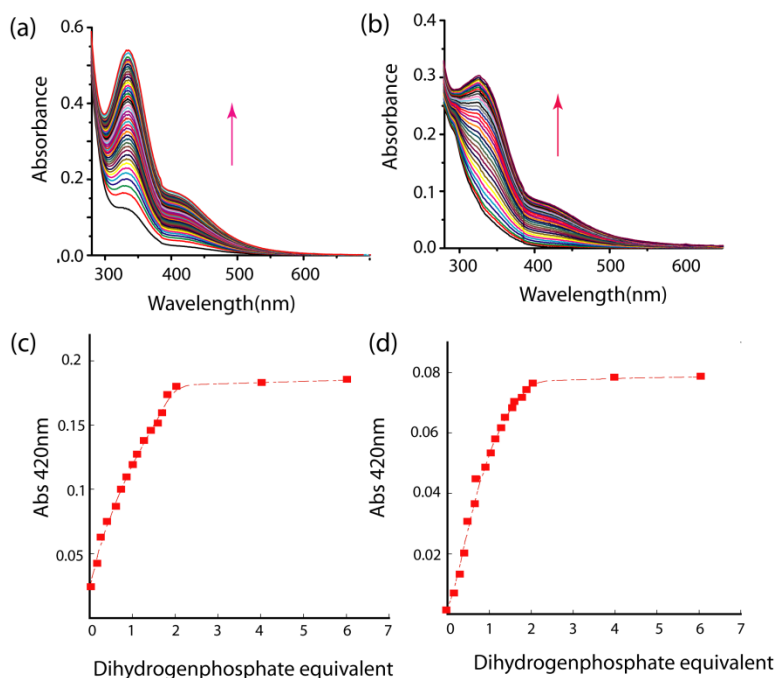

**Fig. S14** a) UV-vis titration of the receptor L1 ( $4.0 \times 10^{-5}$  M) in CH<sub>3</sub>CN solution with standard solution of [*n*-Bu<sub>4</sub>N]H<sub>2</sub>PO<sub>4</sub>. (b) The change of UV-vis spectra of the receptor L2 ( $3.4 \times 10^{-5}$  M) in CH<sub>3</sub>CN solution upon gradual addition of standard solution of [*n*-Bu<sub>4</sub>N]H<sub>2</sub>PO<sub>4</sub>. (c) Relative change in the absorption spectra of L1 ( $4.0 \times 10^{-5}$  M) at 420 nm upon addition of dihydrogenphosphate anions in CH<sub>3</sub>CN. (d) Plot of the change in the absorption of L2 upon addition of di-hydrogenphosphate in CH<sub>3</sub>CN.

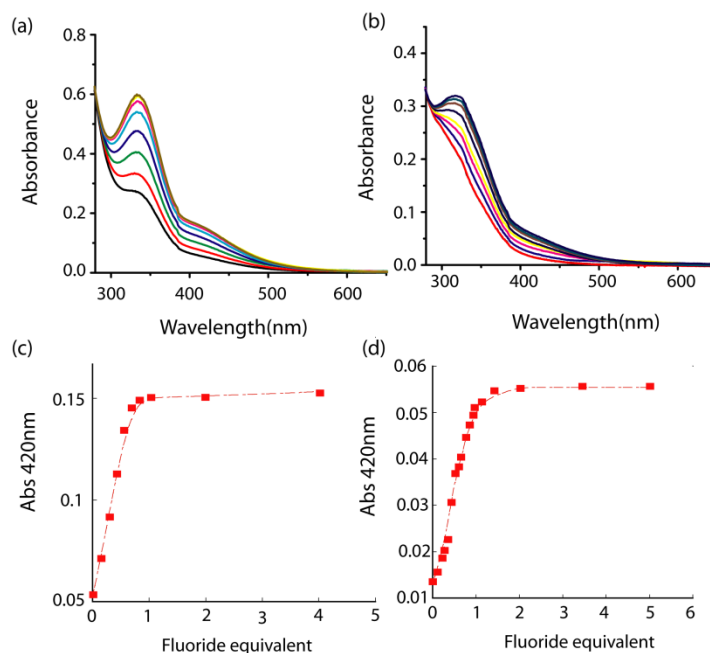

**Fig. S15** a) UV-vis titration of the receptor L1( $4.0 \times 10^{-5}$  M) in DMSO-H<sub>2</sub>O (5 : 1) (v/v) solution with standard solution of [n-Bu<sub>4</sub>N]F. (b) The change of UV-vis spectra of the receptor L2 ( $3.4 \times 10^{-5}$  M) in DMSO-H<sub>2</sub>O (5 : 1) (v/v) solution upon addition of standard solution of [n-Bu<sub>4</sub>N]F. (c) Relative change in the absorbance of L1 ( $4.0 \times 10^{-5}$  M) at 420 nm upon addition of fluoride anions in DMSO-H<sub>2</sub>O (5 : 1) (v/v). (d) Plot of the change in the absorbance at 420nm of L2 upon addition of fluoride in DMSO-H<sub>2</sub>O (5 : 1) (v/v).

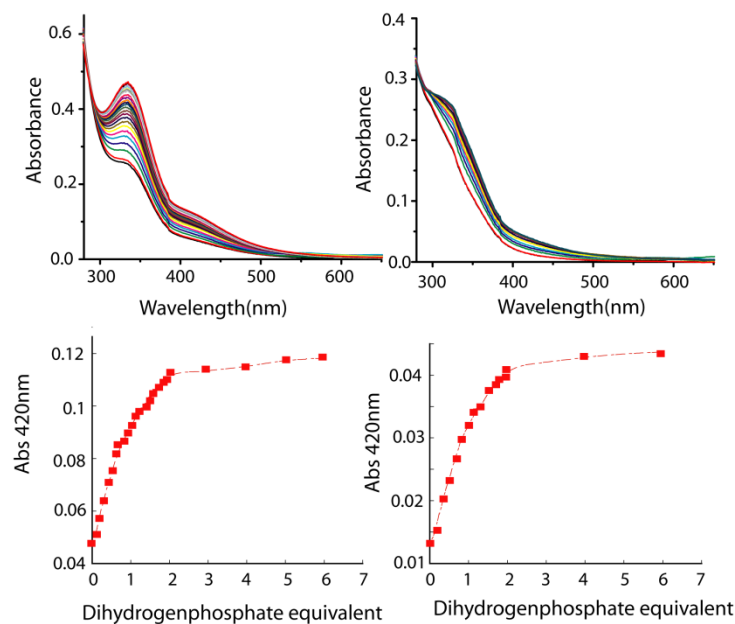

**Fig. S16** a) UV-vis titration of the receptor L1 ( $4.0 \times 10^{-5}$  M) in DMSO-H<sub>2</sub>O (5 :1) (v/v) solution with standard solution of [n-Bu<sub>4</sub>N]H<sub>2</sub>PO<sub>4</sub>. (b) The change of UV-vis spectra of the receptor L2 ( $3.4 \times 10^{-5}$  M) in DMSO-H<sub>2</sub>O (5 :1) (v/v) solution upon addition of standard solution of [n-Bu<sub>4</sub>N]H<sub>2</sub>PO<sub>4</sub>. (c) Relative change in the absorbance of L1 ( $4.0 \times 10^{-5}$  M) at 420 nm upon addition of di-hydrogenphosphate anions in DMSO-H<sub>2</sub>O (5 :1) (v/v). (d) Plot of the change in the absorbance at 420nm of L2 upon addition of di-hydrogenphosphate in DMSO-H<sub>2</sub>O (5 :1) (v/v).

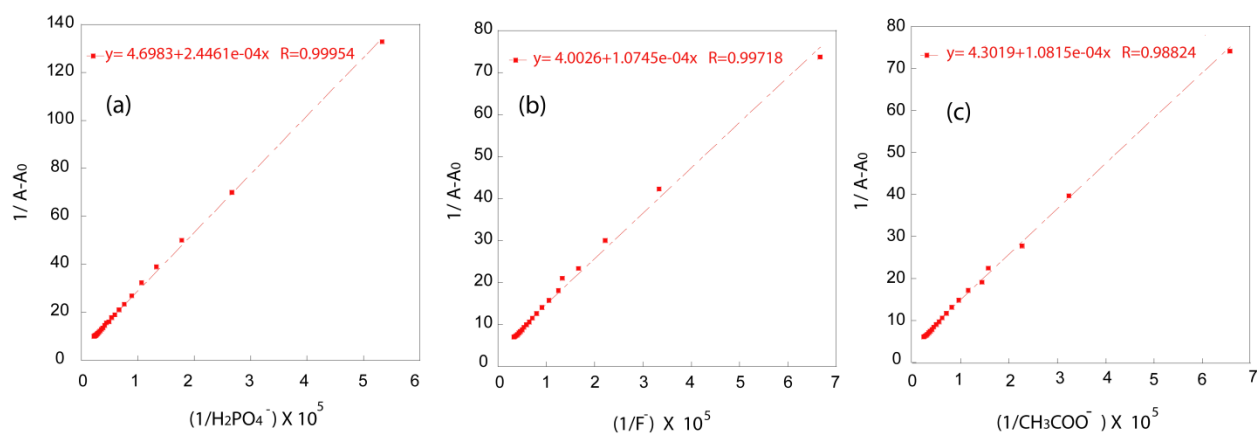

**Fig. S17** Benesi-Hildebrand plots of L1 in CH<sub>3</sub>CN with (a) Di-hydrogenphosphate, (b) Fluoride (c) Acetate.

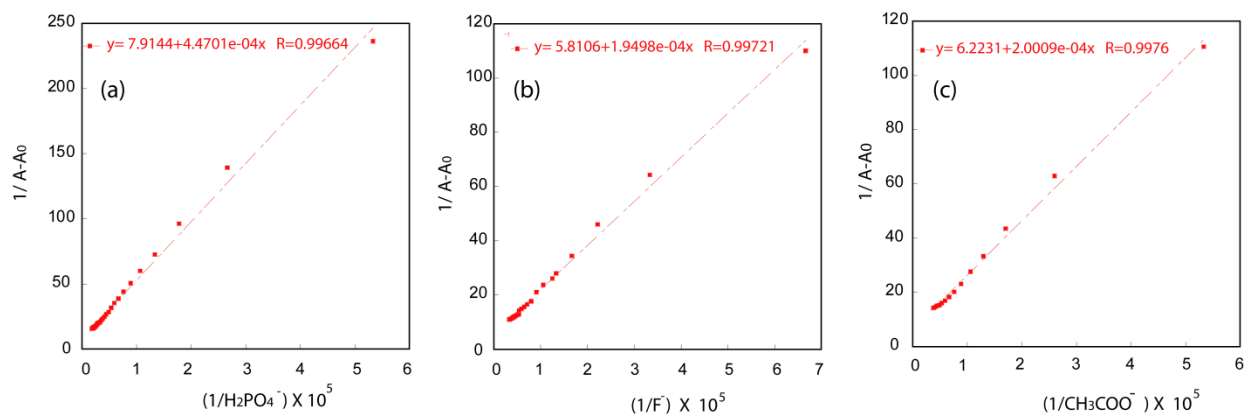

**Fig. S18** Benesi–Hildebrand plots of L2 in CH<sub>3</sub>CN with (a) Di-hydrogenphosphate, (b) Fluoride (c) Acetate.

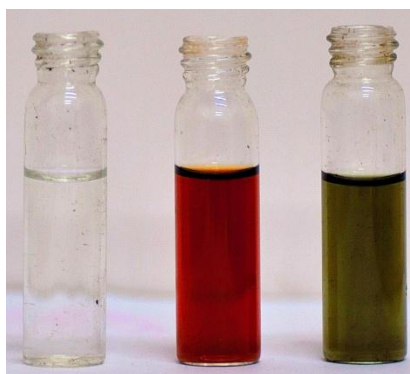

**Fig.S19.** Hydroxide induce step-wise color changes observed for receptor L1.

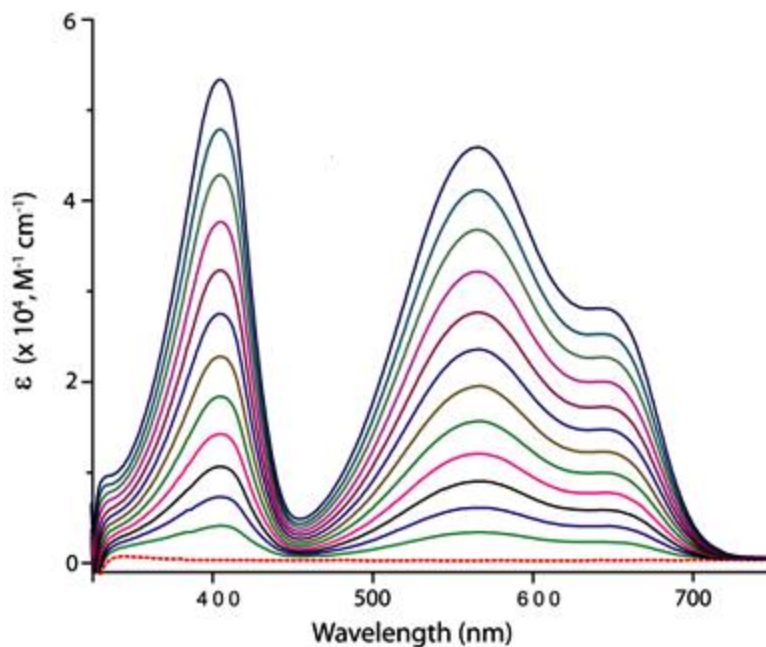

**Figure S20.** UV-Vis absorption titration of  $L_C$  ( $10 \mu\text{M}$ ) in  $\text{CH}_3\text{CN}$  upon addition of standard hydroxide solution ( $10 \text{ mM}$ ). (Figure reproduced from S. K. Dey and G. Das, *Chem. Commun.*, 2011, **47**, 4983–4985).

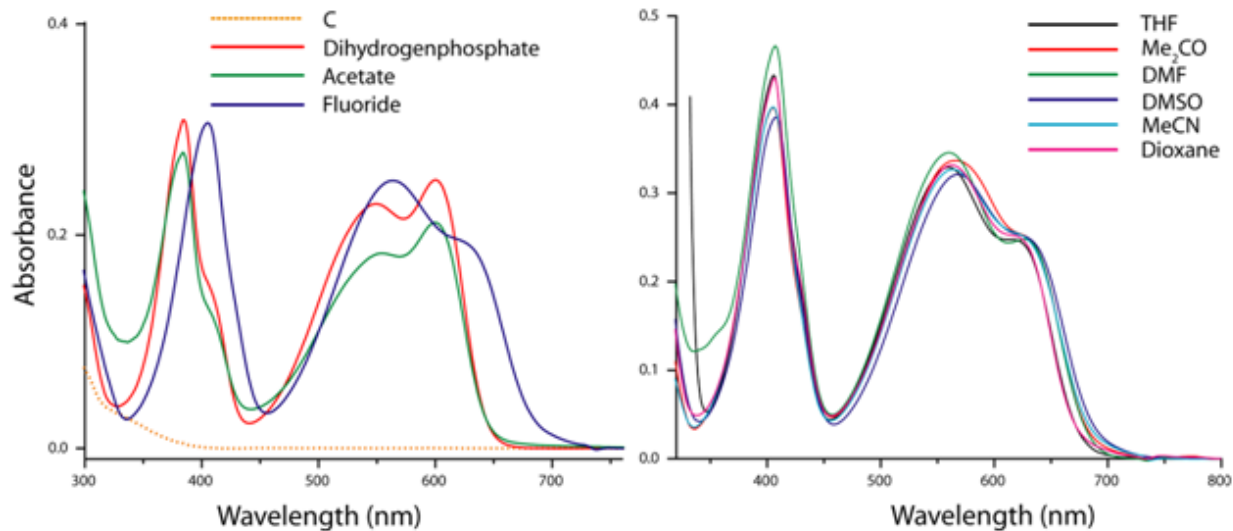

**Figure S21.** Changes in the UV-vis spectrum of  $L_C$  in acetonitrile solution upon addition of TBA salts of strongly basic anions such as, fluoride, acetate and dihydrogenphosphate anions (left) and no observable changes have been observed in the UV-vis spectrum of  $L_C$  in various aprotic solvents upon addition of TBAOH salt (right). (Figure reproduced from S. K. Dey and G. Das, *Chem. Commun.*, 2011, **47**, 4983–4985).

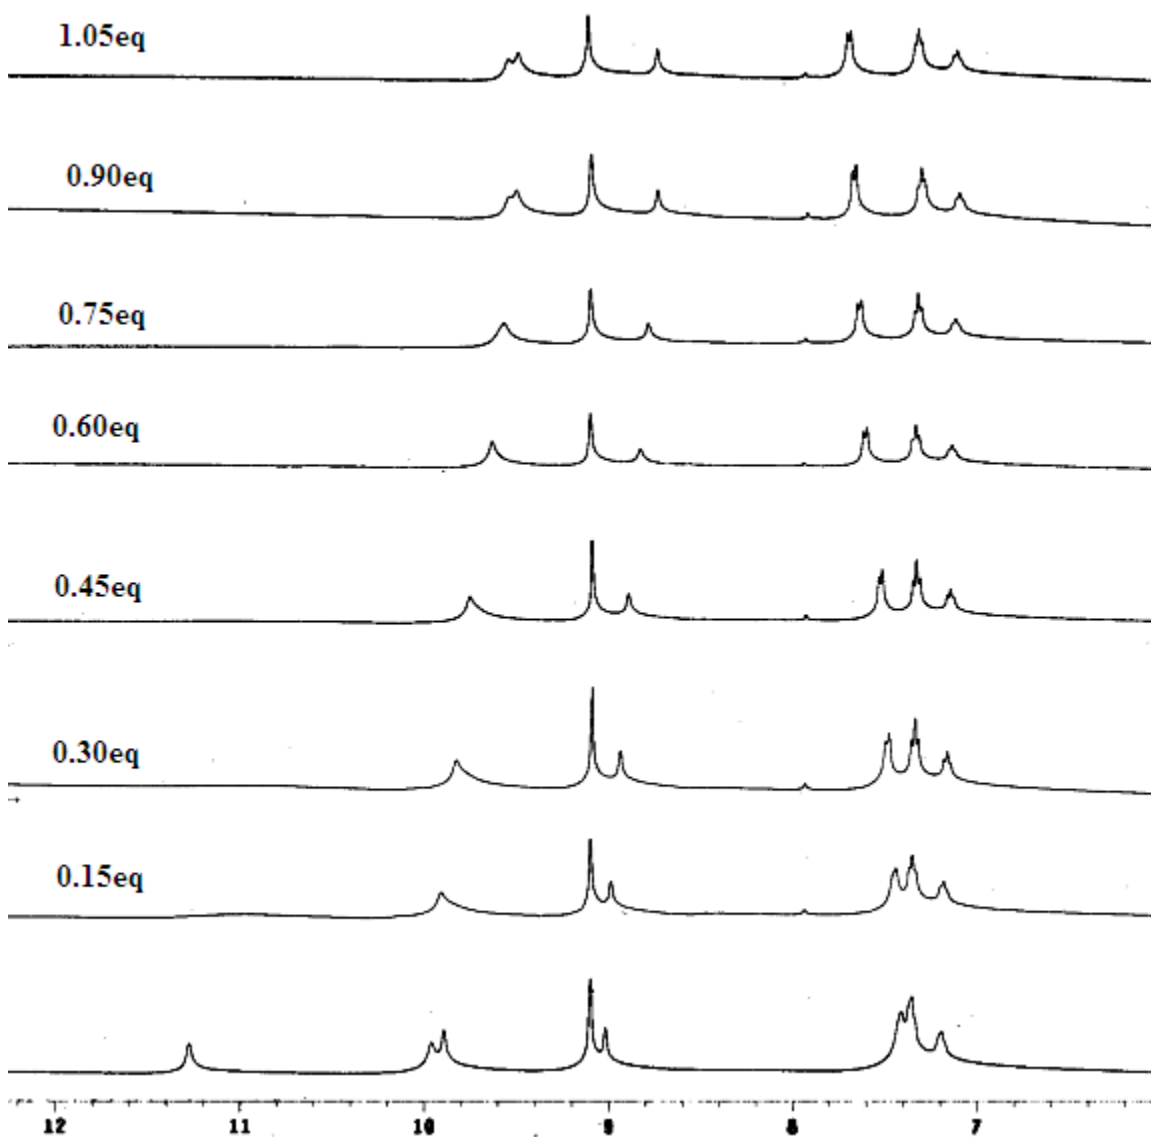

**Fig. S22** Stack plot of the <sup>1</sup>H NMR spectra of receptor L1 in the presence of increasing amounts of [n-Bu<sub>4</sub>N]F recorded in *d*<sub>6</sub>-DMSO at 298 K.

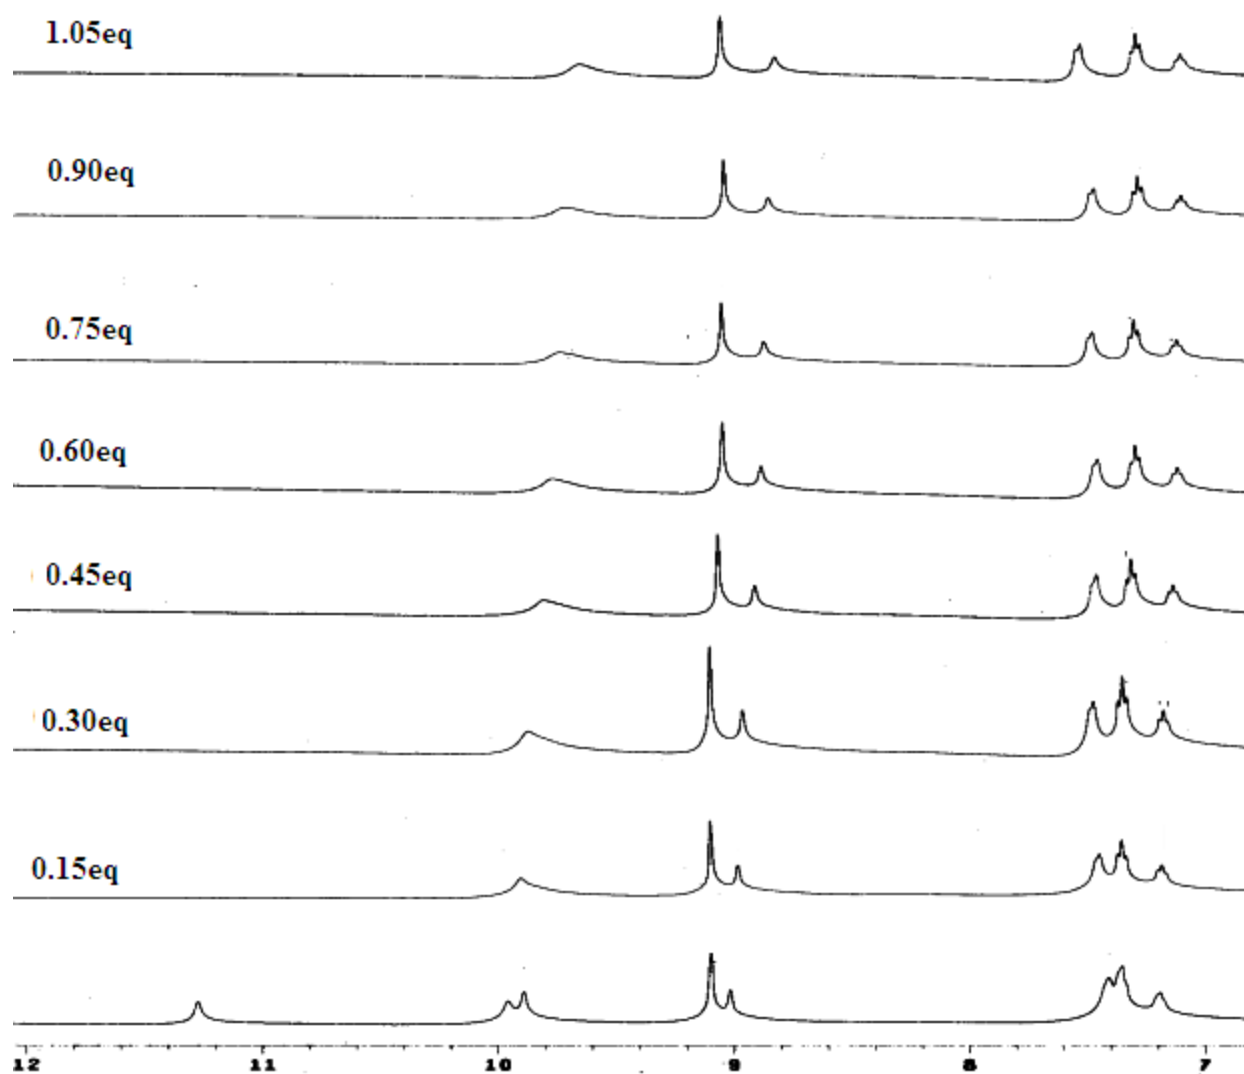

**Fig. S23** Stack plot of the <sup>1</sup>H NMR spectra of receptor L1 in the presence of increasing amounts of [n-Bu<sub>4</sub>N]H<sub>2</sub>PO<sub>4</sub> recorded in *d*<sub>6</sub>-DMSO at 298 K.



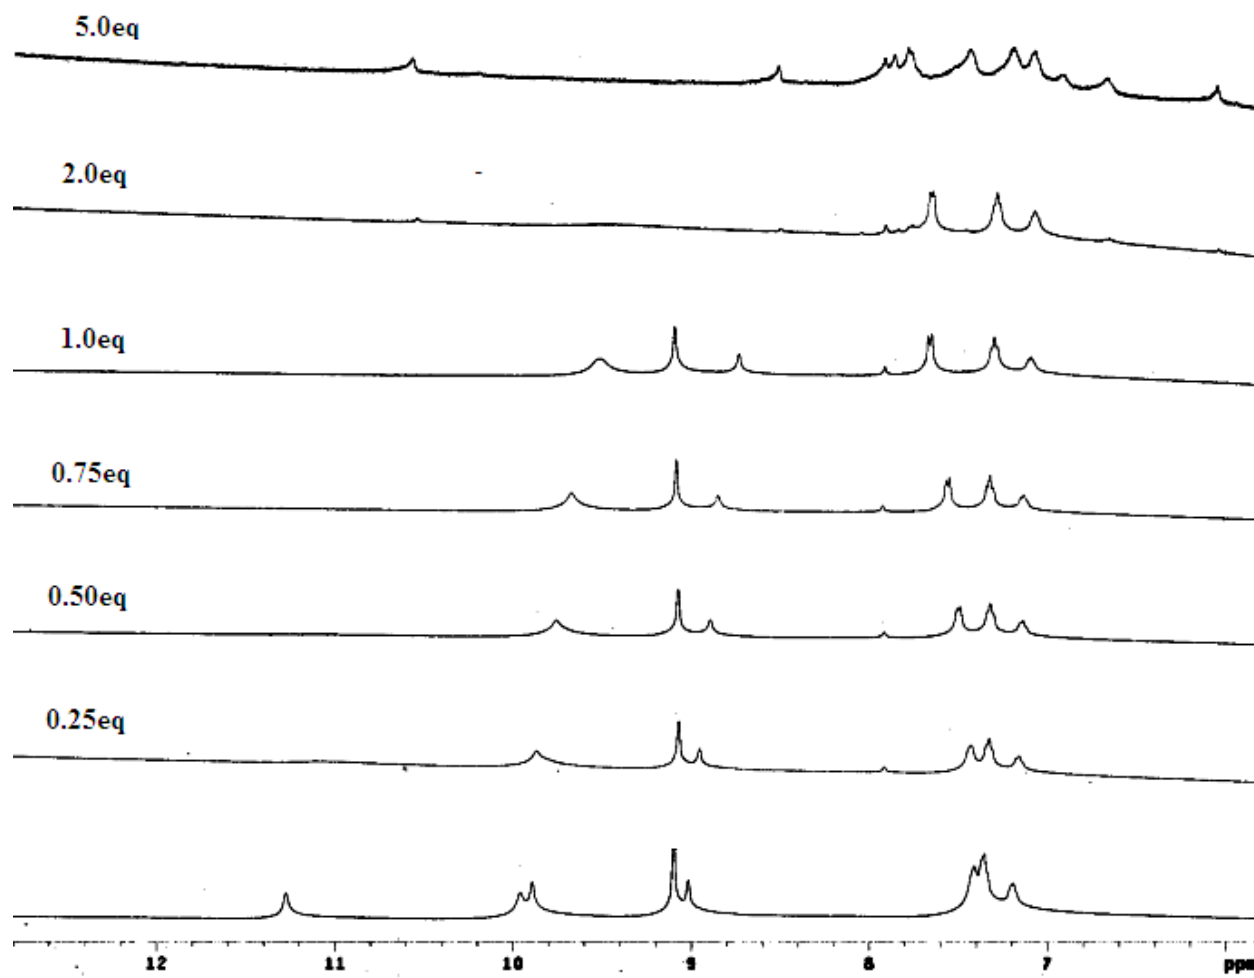

**Fig. S24** Stack plot of the  $^1\text{H}$  NMR spectra of receptor L1 in the presence of increasing amounts of  $[n\text{-Bu}_4\text{N}]\text{OH}$  recorded in  $d_6$ -DMSO at 298 K.

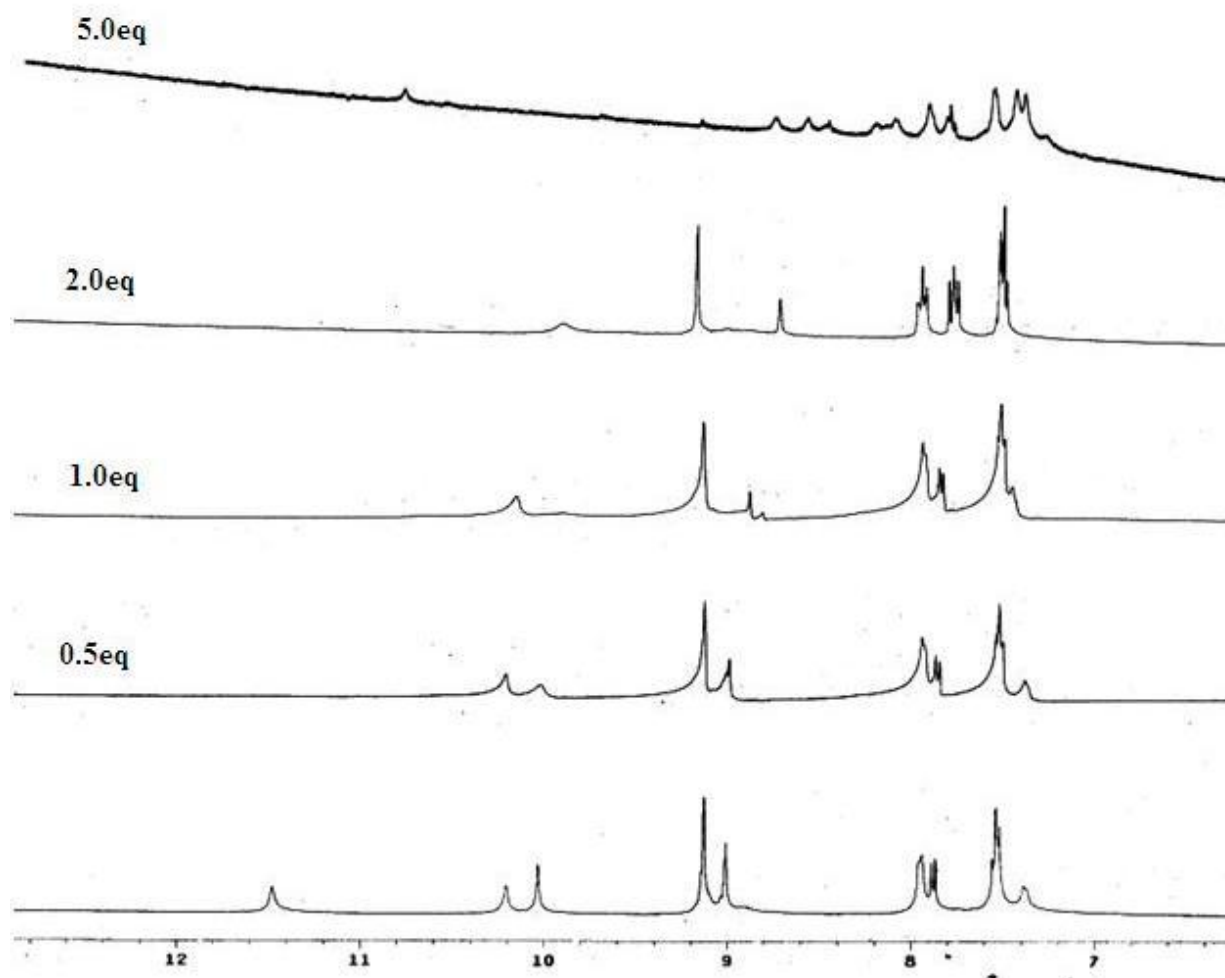

**Fig. S25** Stack plot of the  $^1\text{H}$  NMR spectra of receptor L2 in the presence of increasing amounts of  $[\text{n-Bu}_4\text{N}]\text{OH}$  recorded in  $d_6$ -DMSO at 298 K.

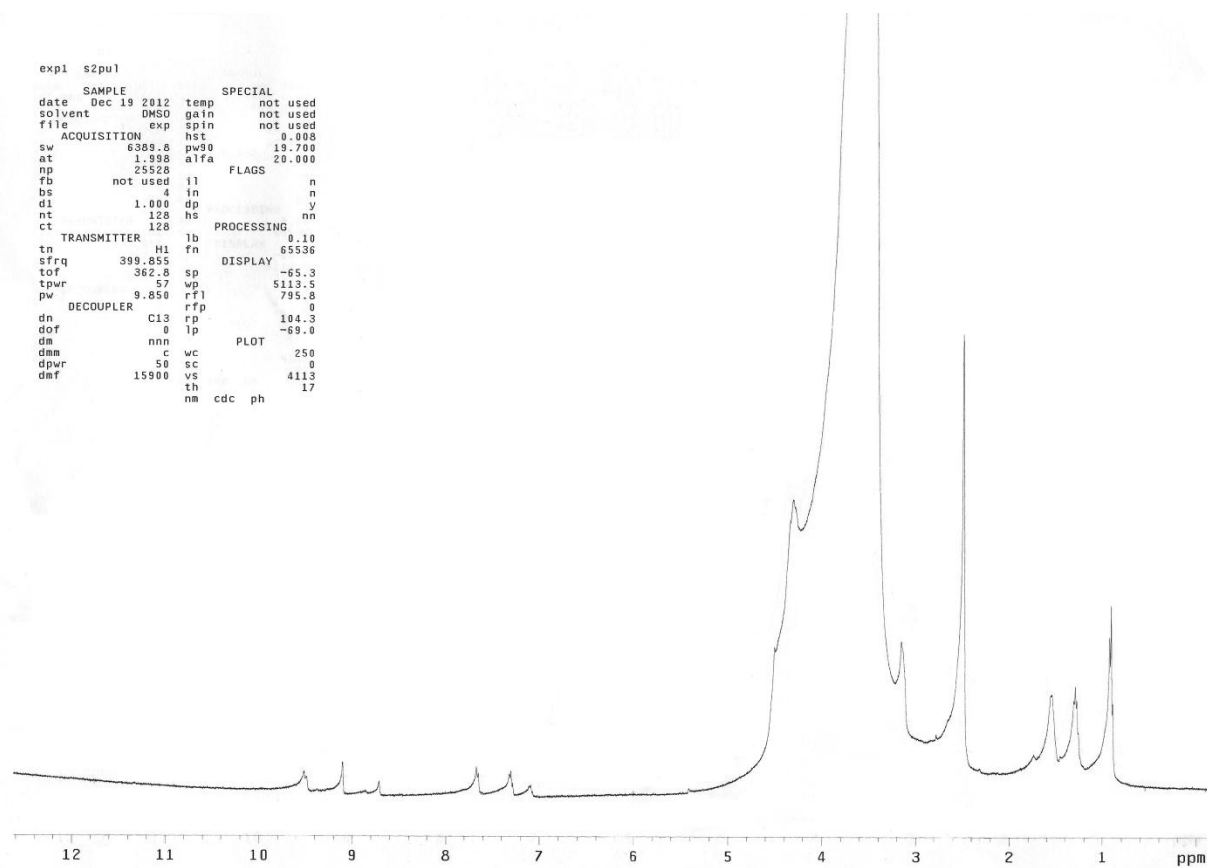

**Fig.S26**  $^1\text{H}$ -NMR spectrum of Salt 1 in  $d_6$ -DMSO at 298K

|               |            |             |        |                 |              |                        |                       |
|---------------|------------|-------------|--------|-----------------|--------------|------------------------|-----------------------|
| Sample Name   | AB-L-neg   | Position    | Vial 1 | Instrument Name | Instrument 1 | User Name              |                       |
| Inj Vol       | -1         | InjPosition |        | SampleType      | Sample       | IRM Calibration Status | Success               |
| Data Filename | AB-L-neg.d | ACQ Method  |        | Comment         |              | Acquired Time          | 12/21/2012 3:45:33 PM |

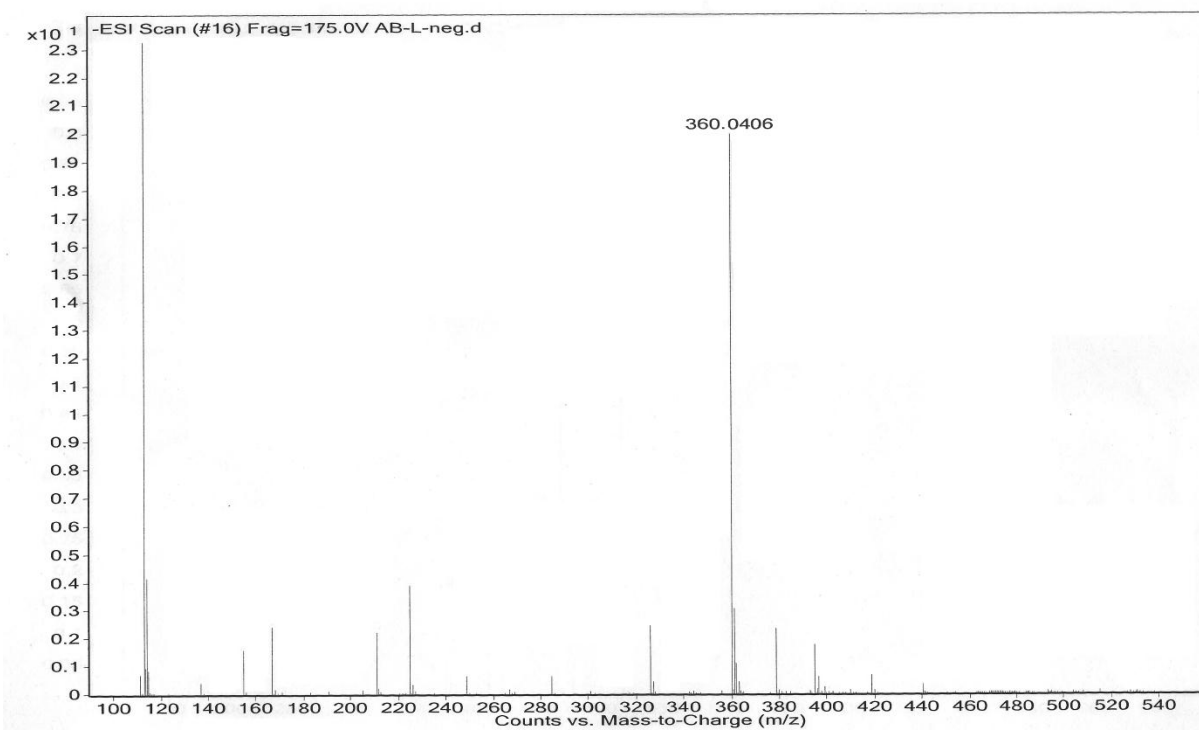

**Fig.S27** Mass spectrum of Salt 1 in acetonitrile.

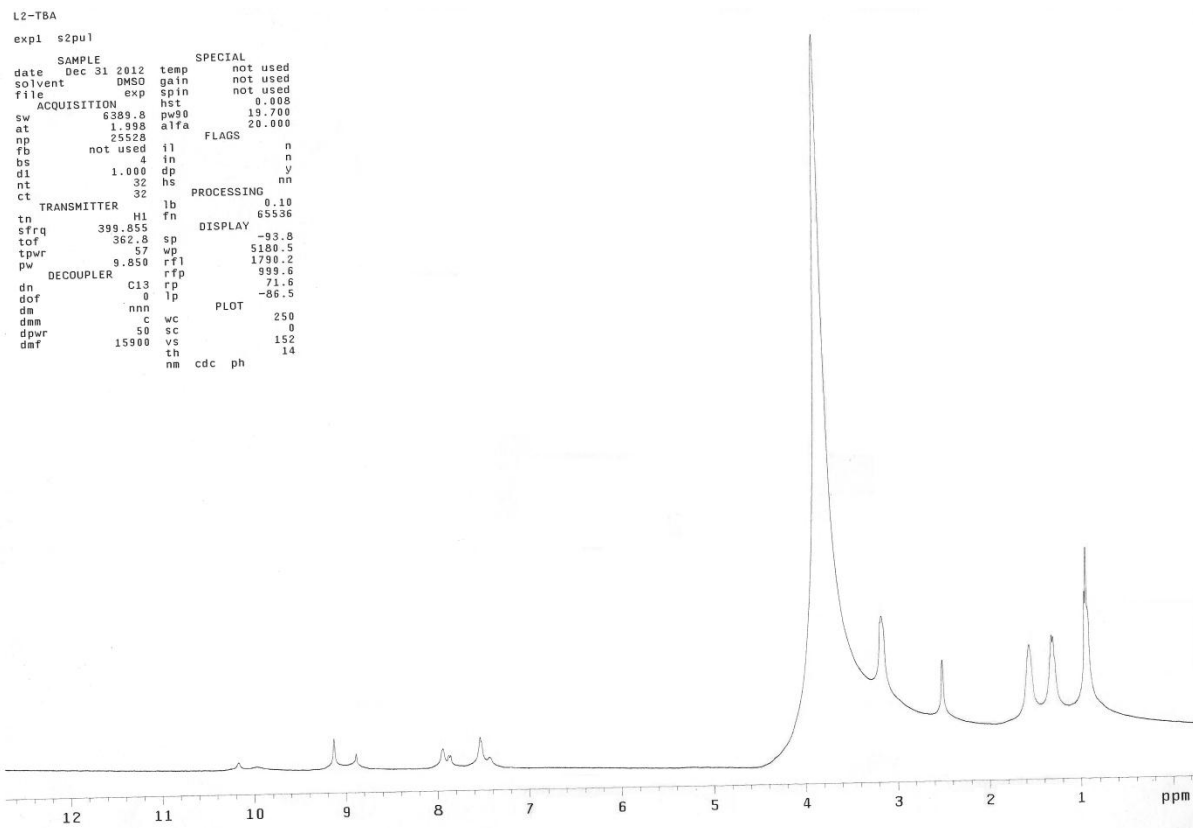

**Fig.S28**  $^1\text{H}$ -NMR spectrum of Salt 3 in  $d_6$ -DMSO at 298K.

|               |              |             |             |                 |                                   |                        |             |
|---------------|--------------|-------------|-------------|-----------------|-----------------------------------|------------------------|-------------|
| Sample Name   | Unavailable  | Position    | Unavailable | Instrument Name | Unavailable                       | User Name              | Unavailable |
| Inj Vol       | Unavailable  | InjPosition | Unavailable | SampleType      | Unavailable                       | IRM Calibration Status | Success     |
| Data Filename | TBA-L2-OAC.d | ACQ Method  |             | Comment         | Sample information is unavailable | Acquired Time          | Unavailable |

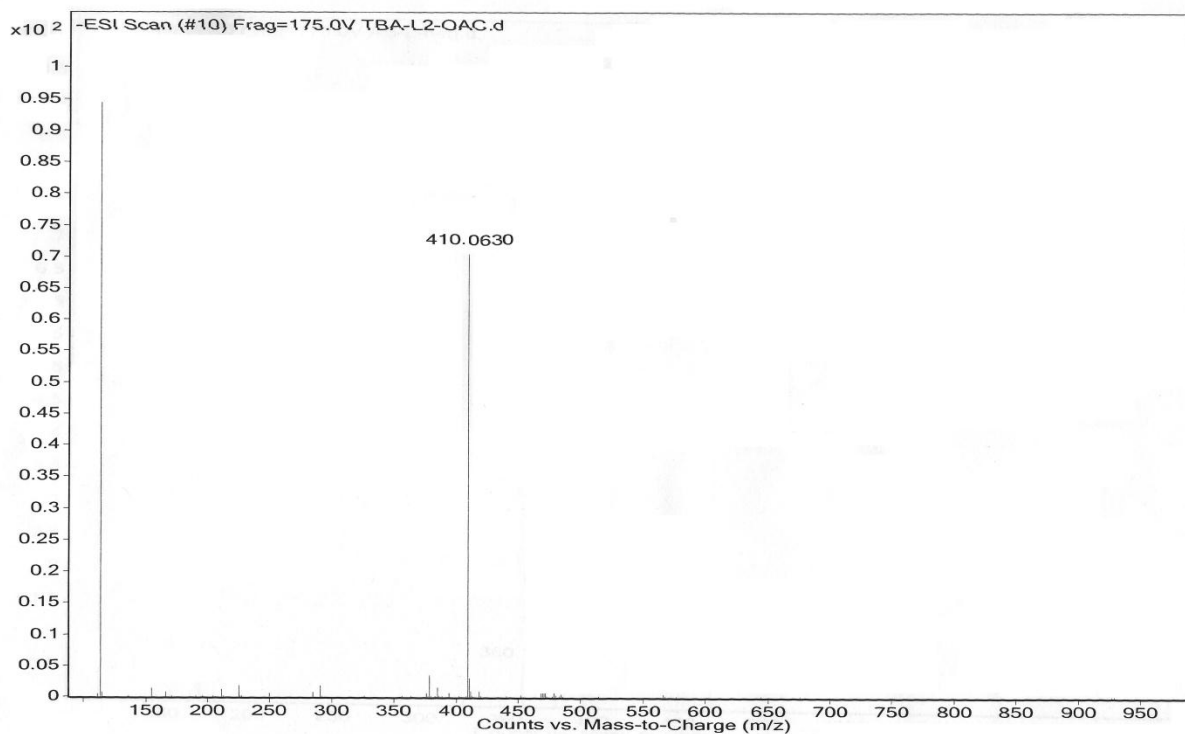

**Fig.S29** Mass spectrum of Salt 3 in acetonitrile.
